# Supplementary material for: Metals Health Nexus: Research, Impact, Review, and Sustainable Remediation
Source: Research Square preprint supplement (doi:10.21203/rs.3.rs-3644698/v1), 2024-03-11
Supplement: Supplementary file 1 [file ca64c99e0a5bbe0aa685b515.docx]

**Supplementary Material**

 Table: 1: Safe Permissible Limit of Heavy Metals in Fruits, Vegetables, Water, and Soil as FAO /WHO standard 2001, 2007 and IS: 10500:1993

| Metal | Fruits/Veg.  ( mg/kg) | Soil  ( mg/kg) | Water  (mg/l) | Papaya  (mg/kg) | Guava  (mg/kg) | Effluent  IS:10500  (mg/l) |
| --- | --- | --- | --- | --- | --- | --- |
| Cu | 73 | 5-5.6 | 2 |  |  | 3.0 |
| Pb | 0.30 | 2-13.4 | 0.01 | Nd | 0.58 | 0.10 |
| Cd | 0.20 | 0.1 | 0.003 | Nd | Nd | 1.0 |
| Cr | 0.1-1 | 10-80 | 0.05 |  |  | 2.0 |
| Zn | 99.4 | 60-780 | 3 |  |  | 15 |
| Ni | 1-10 | 10-50 | 0.02 | 0.26 | Nd | 3 |

Nd= not detectable, Source a=Adue et.al 2012

Table 2: Pb concentration in effluent, canal, pond, tube well water and soil

| Sl. No | Sample  & year | Canal Water (mg/l) | Effluent (mg/l) | Pond water (mg/l) | Tube well water (mg/l) | Soil  (mg/kg) |
| --- | --- | --- | --- | --- | --- | --- |
| 1. | *S-12 | 0.05 | 0.07 | 0.01 | 0.007 | 1.16 |
| 2 | S-12 | 0.05 | 0.08 | 0.25 | ------ | 11.14 |
| 3. | S-12 | 0.104 | ----- | ------ | ------ | 17.32 |
| 4. | S-12 | 0.03 | ----- | ------ | ------ | 41.20 |
| 5. | S-13 | 0.014 | 0.25 | 0.016 | 0.058 | 90.80 |
| 6. | S-13 | 0.15 | 1.84 | 0.01 | ------ | ------ |
| 7. | S-13 | 0.10 | 0.10 | ------ | ------ | ------ |
| 8. | S-13 | 0.10 | 0.14 | ------ | ------ | ------ |
| 9. | S-13 | ---- | 0.17 | ------ | ------ | ------ |
|  | Mean | 0..38 | 0.074 | 0.07 | 0.02 | 32.32 |
|  | S.D | 0.27 | 0.67 | 0.10 | 0.02 | 32.07 |

*S-12, 13 indicates sample of the 1st year and 2nd year. As per WHO safe limits of Pb concentration in canal water, Effluent, Pond water, tube well water, and soil were very significantly higher (39-fold, 7-fold, 7-fold, 10-fold, ). Further, Mean Pb concentration was found in canal water > soil> effluent ˃ Pond ≥ tube well water. Again, Pb level increases from year 1st year to 2nd year in canal water (0.03 mg/l to 0.15 mg/l), effluent (0.07mg/l to 1.84 mg/l), and tube well water (0.007 mg/l to 0.058 mg/l), and soil (from 1.16mg/kg to 90.80 mg/kg).

Table 3: Content of Nickel in the effluent, canal water, pond, tube well water, and soil

| Sample/  Year | Canal water (mg/l) | Effluent  (mg/l) | pond  (mg/l) | Tube well (mg/kg) | Soil(mg/kg) |
| --- | --- | --- | --- | --- | --- |
| S-12 | 0.05 | - | - | - | 0.34 |
| S-12 | 0.05 | - | - | - | 14.93 |
| S-12 | 0.07 | - | - | - | 34.77 |
| S-12 | 0.05 | - | - | - | - |
| S-13 | 0.037 | 0.049 | 0.02 | 0.016 | - |
| S-13 | 0.037 | 0.093 | - | - | - |
| Mean | 0.05 | 0.07 | 0.02 | 0.016 | 16.68 |
| SD | 0.01 | 0.02 | - | - | 14.11 |

---------------------------------------------------------------------------------------------------------------------------------

As per Sample in Year 2012,13, Mean Ni in Effluent, canal, pond water, and soil were significantly Higher (4- fold, 3-fold, normal, 2- fold) and lower in Tube well water.

Table 4: Content of Zinc in the effluent, canal water, pond, tube well water, and soil

| Sample | Canal water | Effluent | Pond  water | Tube well  water | Soil |
| --- | --- | --- | --- | --- | --- |
|  | Mg/l | Mg/l | Mg/l | Mg/l | Mg/kg |
| *S-12 | 0.05 | 0.94 | 0.004 | 1.15 | 250.84 |
| S-12 | 0.28 | 0.15 | ----- | ------ | 54.26 |
| S-12 | 0.02 | ----- | ----- | ------ | 980.4 |
| S-12 | 0.18 | ----- | ----- | ------ | ------- |
| S-13 | 0.15 | 0.55 | 0.05 | 0 | ------ |
| S-13 | ----- | 0.07 | ------ | ------ | ------ |
| S-13 | ----- | 0.09 | ------ | ------ | ------ |
| Mean | 0.14 | 0.36 | 0.027 | 1.15 | 428.50 |
| S.D | 0.09 | 0.33 | 0.025 | ---- | 398.41 |

As per WHO limits mean Zn level in effluent, canal, pond, tube well water and soil

were very significantly lower (8- fold, 21-fold, 111- fold, 3- fold, 2- fold).

Table 5: Content of Cadmium (Cd) in Soil

| Sample/ year | Soil  mg/kg |
| --- | --- |
| S -12 | 0.94 |
| S-12 | 0.53 |
| R-12 | 1.29 |
| Mean | 0.92 |
| S.D | 0.31 |

As per WHO standard, the Concentration of Cd in Soil was lower ( 9 fold)

| Table 6: Metal concentration papaya and coconut water, guava, coix grass and water hyacinth  for the year 2013 |
| --- |
| | Metal | Papaya  mg/kg | Coconut water  mg/l | Guava  mg/kg | Coix grass mg/kg | Water Hyacinth  mg/kg | | --- | --- | --- | --- | --- | --- | | Pb | 0.45 | 0.41 | 12.62 | 0.66 | 2.75 | | Cd | ---- | ---- | 1.47 | 0.10 | 0.15 | | Cr | ---- | ---- | 0.10 | 0.145 | 0.27 | | Zn | 1.96 | 0.39 | ---- | 13.15 |  | |  |  |  |  |  |  | |  |  |  |  |  |  | |  |  |  |  |  |  | |  |  |  |  |  |  |   Pb levels significantly higher (2-fold, 1.5-fold, 42-fold, 2- fold, 9- fold) , safe limits of Cd in Guava were  Significantly higher ( 7- fold, ), Safe limit of Cr in Guava was normal and Safe limit of Zn in Papaya  Coconut water and Coix grass was significantly Lower 50- fold, 8 –fold, 8 – fold.  Table 7: Concentrations of different metals in green papaya   | Parameters | Na | Pb | Fe | Zn | Al | | --- | --- | --- | --- | --- | --- | | Samples | mg/kg | mg/kg | mg/kg | mg/kg | mg/kg | | S1 | 65.88 | 0.51 | 7.06 | 1.64 | 5.1 | | S2 | 66.72 | 0.62 | 10.86 | 3.01 | 7.56 | | S3 | 64.13 | 0.27 | 9.75 | 2.46 | 3.85 | | S4 | 72.91 | 0.69 | 6.97 | 3.01 | 8.13 | | S5 | 65.86 | 0.3 | 7.59 | 1.66 | 7.84 | | S6 | 63.46 | 0.75 | 11.57 | 2.2 | 3.88 | | S7 | 62.11 | 0.45 | 3.25 | 1.96 | 7.56 | | **Mean** | **65.87** | **0.51** | **8.15** | **2.28** | **6.27** | | Maximum | 72.91 | 0.75 | 11.57 | 3.01 | 8.13 | | Minimum | 63.46 | 0.27 | 3.25 | 1.64 | 3.85 | | Std.Dev | 3.49 | 0.19 | 2.84 | 0.58 | 1.92 | | FAO/WHO  (2011) | --- | 0.10 | 5.0 | 3.0 | 6.00 | | Condition/  Fold higher | --- | 5 | 1.6 | low | 1.05 |   Table 8: Health risk (HRI) assessment due to metals in Papaya   |  | Unit  mg/kg | HQ Adult | HQ Child | DDI | DIM | HRI | | --- | --- | --- | --- | --- | --- | --- | | Mean Pb concentration | 0.51 | 8.70 | 7.28 | 0.0008 | 0. 003 | 0.86 | | Mean Al concentration | 5.1 | 4.60 | 3.21 | 0.0001 | 0.001 | 0.21 | | Total HRI |  |  |  |  |  | 1.07 | | HQ Standard |  | 1.00 | 1.00 |  |  | 1.00 |   DDI=Daily dietary Index, DIM=Daily intake of metal , HRI= Health risk index, Adult=55 year  Based on US EPA(2002) and Hakanson (1980) for HQ and US EPA (2012) for HRI |

**Table 9 : Concentrations (mg/L) of different metals in Guava**

| Samples | Unit | Cd | Pb | Zn |
| --- | --- | --- | --- | --- |
| S1 | mg/L | 0.005 | 0.41 | 0.36 |
| S2 | mg/L | 0.017 | 0.052 | 0.39 |
| S3 | mg/L | 0.009 | 0.161 | 0.775 |
| S4 | mg/L | 0.019 | 0.172 | 0.835 |
| S5 | mg/L | 0.009 | 0.181 | 0.431 |
| S6 | mg/L | 0.019 | 0.18 | 0.853 |
| S7 | mg/L | 0.009 | 0.197 | 0.566 |
| **Mean** |  | **0.01** | **0.19** | **0.6** |
| Maximum | | 0.02 | 0.41 | 0.85 |
| Minimum | | 0.01 | 0.52 | 0.85 |
| Std. dev. |  | 0.01 | 0.11 | 0.22 |
| FAO/WHO  (2011) |  | 0.003 | 0.01 | 5.0 |

**Table 10: Concentrations (mg/L) of different metals in coconut**

**water collected from local area**

| Details (mg/L) | Cd(mg/L) | Pb(mg/L) | Zn(mg/L) |
| --- | --- | --- | --- |
| Mean | 0.01 | 0.19 | 0.60 |
| Maximum | 0.019 | 0.41 | 0.85 |
| Minimum | 0.009 | 0.052 | 0.36 |
| Std. Dev. | 0.01 | 0.11 | 0.22 |
| Permissible  Standard FAO,2002 | 0.01 | 0.05 | 5.00 |
| Higher/Lower(Fold) | At par | 4 | (8.33) |
| Condition | Less nutrient |  | Less nutrient |

Note :limits of permissible concentration as per FAO/WHO,2002

Table 11: **Disease profile**

| Serial no | **Waterborne diseases** | Yes (%) | Remarks |
| --- | --- | --- | --- |
| 1 | Digestive problem | 78.00% | Related to Gastroenterology |
| 2 | Diarrhea | 12.32% | Related to Gastroenterology |
| 3 | Dysentery | 35.61% | Related to Gastroenterology |
| 4 | Typhoid | 8.00% | ----- |
| 5 | Cholera | 7.00% | Related to Gastroenterology |
| 6 | Hepatitis/liver trouble | 6.84% | Related to Gastroenterology |
| 7 | Vomiting | 53.42% | Related to Gastroenterology |
| 8 | Discoloration of teeth | 63.01% | Related to Gastroenterology |

Table 12: Socioeconomic profile based on survey

| Sl No. | Particulars | Details | Other information |
| --- | --- | --- | --- |
| 1 | Type of respondent | Male: 84.94% | Female: 15.06% |
| 2 | Type of Respondent | Local: 41.09% | Migrated:58.91 % |
| 3 | Age group | 21—40yrs: 78.08% | 50 -55 yr: 17.08% |
| 4 | Literacy rate | Literate : 89.04% | Illiterate: 10.96% |
| 5 | Type of Literacy | Class I—IV: 45.28% | Class V—X:25.00 %  Class X-XII: 12.00%  Higher Education: 6.85 %  Balance NA : 10.95% |
| 6 | Type of Occupation | Textile Bleaching and dyeing: 56.00 % | Different small business : 32.00%, Automobile & 0thers : 12.00% |
| 7 | Annual Income | ≤Rs. 36,000/- : 1.36 % | ≥ Rs.60,000/- : 86.32%  ≥1,20,000/- : 12.32% |


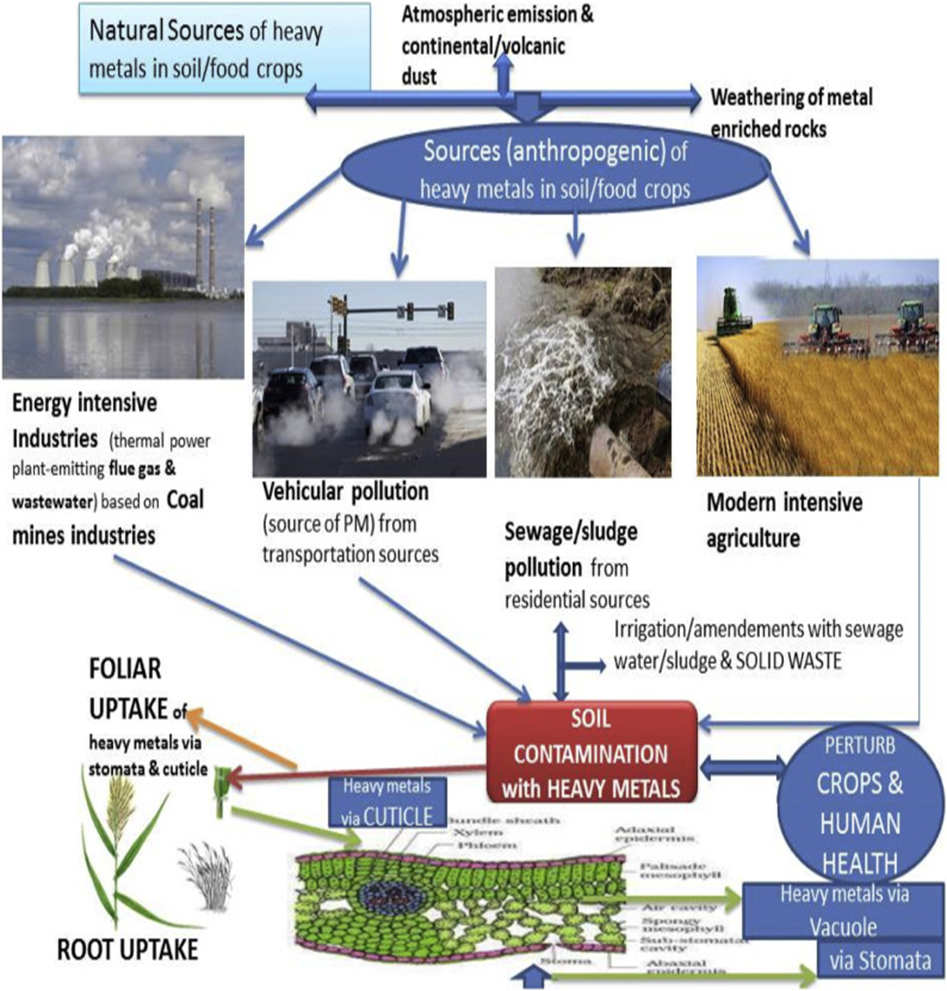


Fig. 1. The toxic metal contamination in food crops and the mechanisms of their entrance (through stomata/cuticle) with resulting effects on biota and humans.


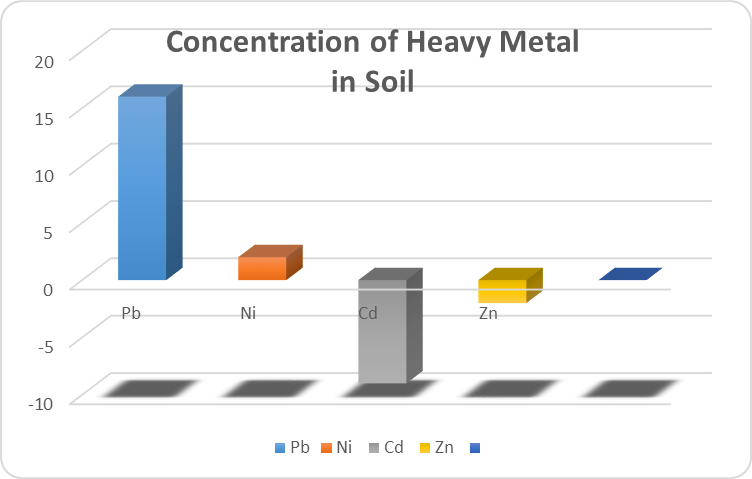


Figure 2:. The concentration of different heavy metals in soils collected from agricultural land in the vicinity of the bleaching and dyeing units. Respective concentrations have been represented in proportionate to increased or decreased levels expressed in folds.


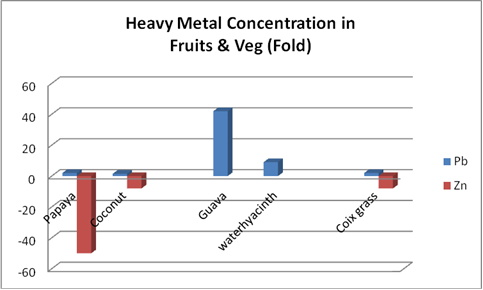


Fig 3: Pb and Zn concentrations in fruits , vegetables and plants are shown either in

             higher or lower order (fold) respectively against WHO/FAO and IS:10500:1993

             standards.
